# Supplementary material for: LHCSR3-Type NPQ Prevents Photoinhibition and Slowed Growth under Fluctuating Light in Chlamydomonas reinhardtii
Source: MDPI journal article supplement (doi:10.3390/plants9111604), 2020-11-18
Supplement: s1 [file s1]

**A**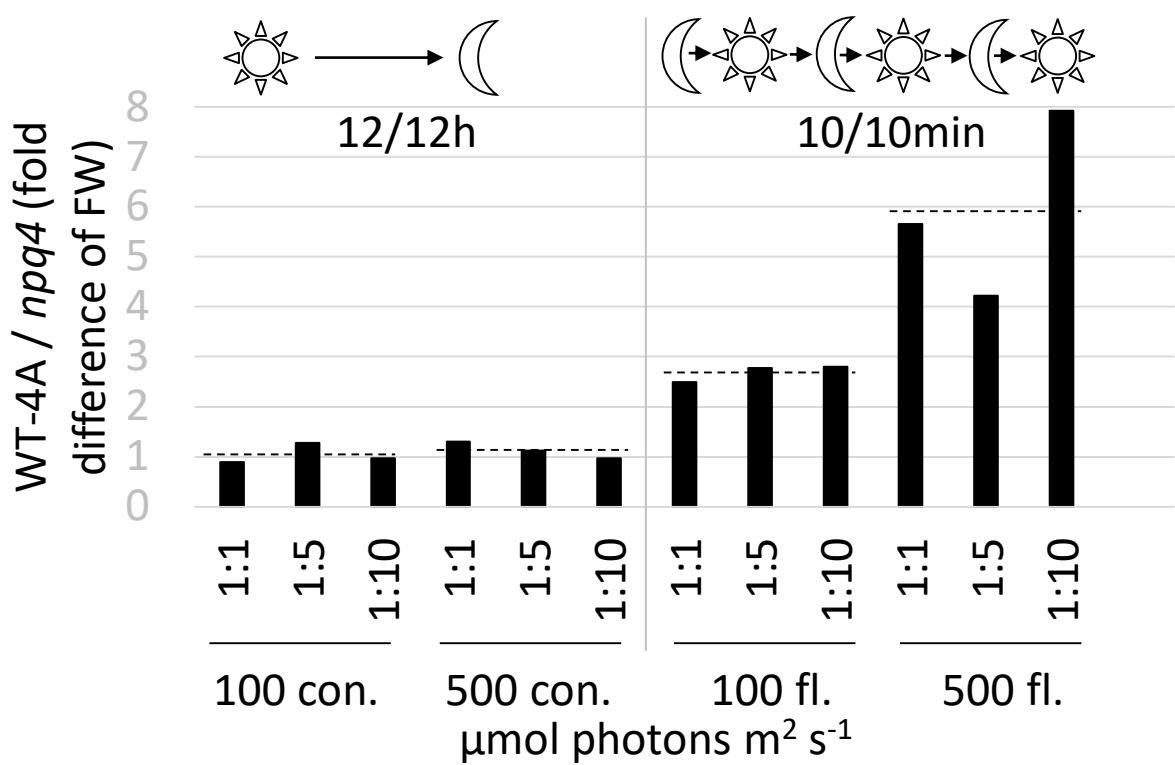**B**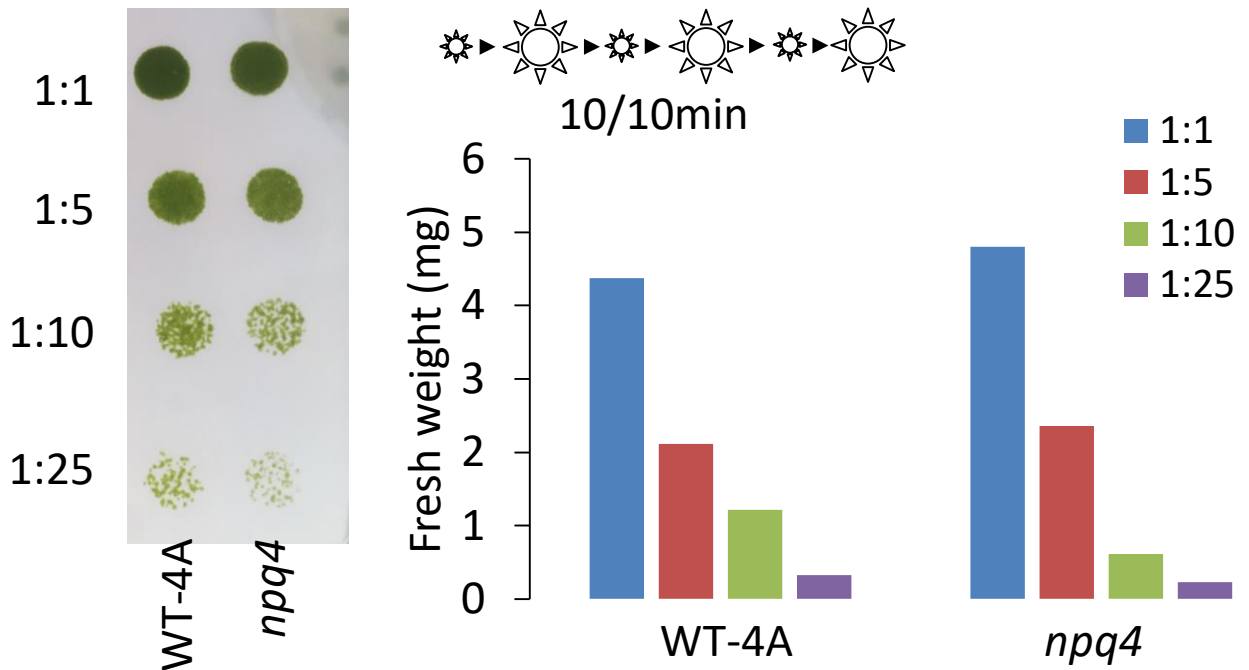

**Supplementary Figure 1.** Colony growth comparison of LHCSR3-deficient *npq4* mutant relative to wild type (WT-4A) under various light treatments. **(A)** Cells were cultured under repeated 10 minute fluctuations (fl.) of light intensity between 0 (moon) and 100 or 500  $\mu\text{mol photons m}^{-2} \text{s}^{-1}$  (sun), or diurnal (12/12h) constant light (con.) at the same two intensities. Data is shown as fold difference between fresh weight of all WT-4A and *npq4* colonies at each initial culture dilution and after 6-8 days culturing (see methods). The average fold-difference is depicted by a dashed line. **(B)** Growth of *npq4* and WT-4A under light fluctuating between 50 and 500  $\mu\text{mol photons m}^{-2} \text{s}^{-1}$  (small sun, big sun). Representative images of colonies growing on agar are shown to the left of average colony fresh weight after 7 days of each initial culture dilution.

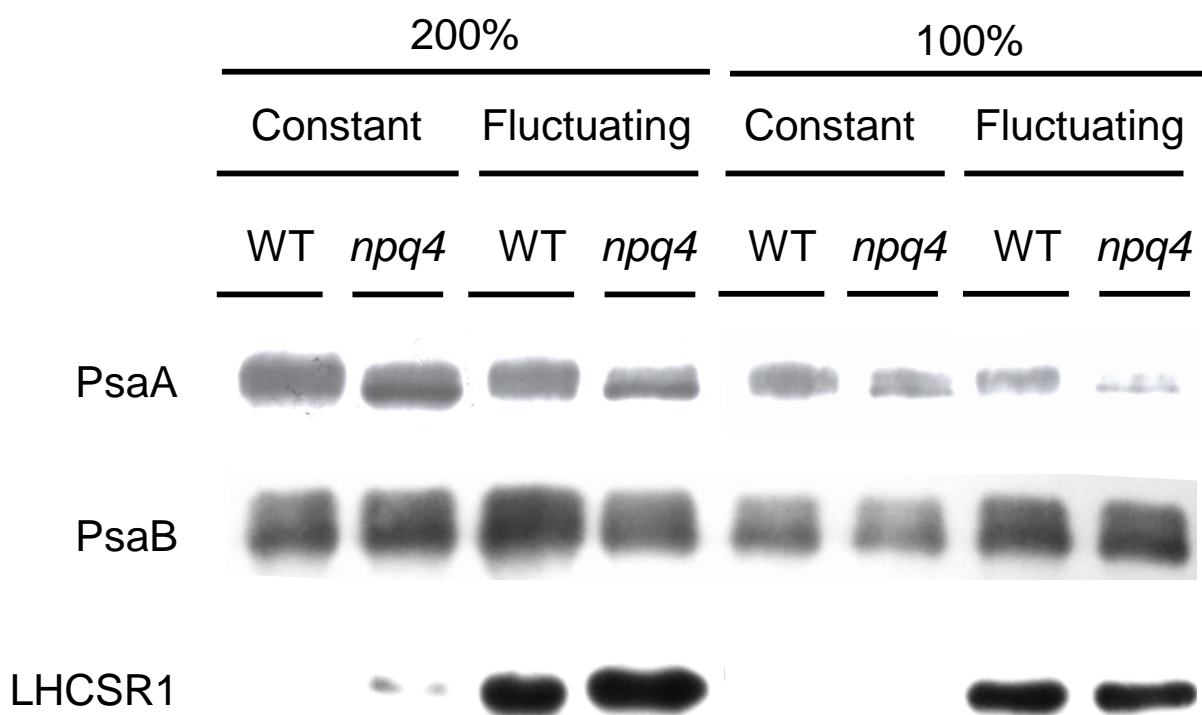

**Supplementary Figure 2.** Western blots of proteins from WT and *npq4* cells under constant or fluctuating light at  $500\mu\text{mol photons m}^{-2} \text{s}^{-1}$ . For PsaA, proteins were loaded at  $20\mu\text{g}$  (200%) or  $10\mu\text{g}$  (100%) total protein, and for PsaB and LHCSR1, proteins were loaded at  $2\mu\text{g}$  (200%) or  $1\mu\text{g}$  (100%) total protein. All bands are from the same blot and transferred from the same gel.

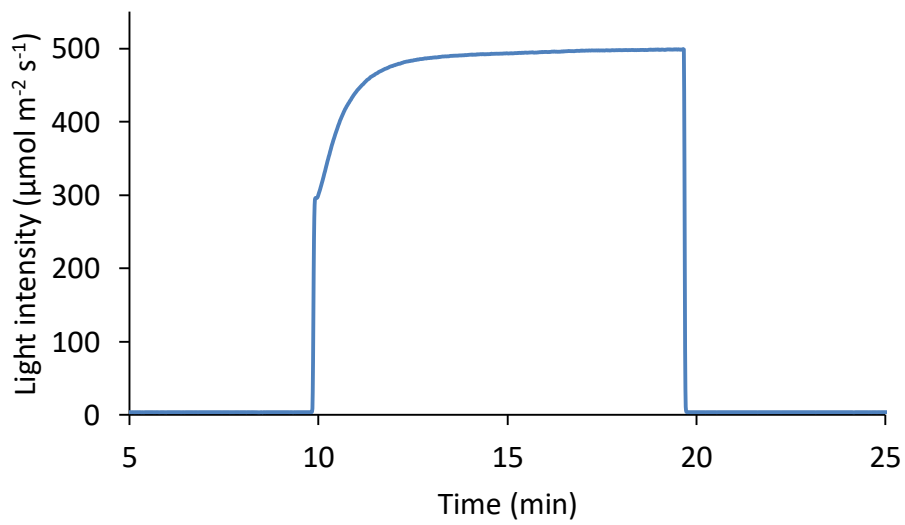

**Supplementary Figure 3.** The change in light intensity during 10min of fluctuating light, as measured with SQ-520 PAR sensor (Apogee Instruments).
